# Supplementary material for: Een kwalitatief onderzoek naar het zoeken naar hulp door boeren met psychosociale problemen
Source: Springer Nature journal article supplement (doi:10.1007/s12508-022-00334-1), 2022-04-22
Supplement: MOESM1 [file 20335998]

**Bijlage 1: topiclist**

**Gezondheid (Voorbereidende vragen) 15 minuten**

- Wat betekent gezondheid voor jou? Kun je dat omschrijven?
  - (check of er een mentale component in zit, als niet zelf genoemd, vraag daarop door)
- Welke dingen hebben volgens jou invloed op je gezondheid?
  - Psyche invloed op gezondheid?
- Wat kun je zelf doen om je gezondheid te beïnvloeden?
  - Ook psychische maatregelen?
- Hoe ga jij met problemen om?
  - Zelf oplossen, eigen verantwoordelijkheid
  - anderen niet willen “lastigvallen”
  - terugtrekken, zich verschuilen
- Hoe ga je met negatieve emoties om?
  - Stoïcijns: ontkennen, onderdrukken, controleren
- Kun je je sociale netwerk beschrijven?
  - Isolatie, weinig contacten

**Psychologie (Analyse), 30 minuten**

- Wat zijn volgens jou psychosociale problemen? Ken je het begrip psychosociale problemen?
- Heb je daar last van of last van gehad?
  - Herken je psychische problemen eigenlijk bij jezelf?
  - Zo ja, hoe ben je daarmee omgegaan?
- Hoe ontstaan volgens jou psychosociale problemen?
  - (hierbij ook letten op eigen verantwoordelijkheid)
  - Kennis over mentale/psychosociale problemen
- Hoe ga jij om met psychosociale problemen? Hoe verhelp je ze/wend je ze af?
  - ook letten op eigen verantwoordelijkheid, self-efficacy. Problemen los je zelf op
  - Praten helpt niet
  - Anderen niet willen “lastigvallen”

**Hulpverlening, 30 minuten**

- Zie je daar een rol voor hulpverlening bij? Of andere, informele zorg/hulp? Self-efficacy
- Heb je daar weleens hulp voor gehad?
  - Zo ja, hoe waren je ervaringen?
- Ben je bekend met het hulpaanbod bij psychosociale problemen? Zo niet, waarom niet denk je? (te weinig mond-op-mondreclame, te weinig acquisitie?)
- Zou je gebruik maken van hulp? Welke hulp? Wat zijn je verwachtingen ervan?
  - Speelt “boerentrots (we hangen de vuile was niet buiten) een rol?
  - Speelt taboe een rol?
  - Voelt hulp zoeken als opgeven?
- Zijn er redenen om af te zien van het zoeken van hulp als je wel problemen hebt? Zo ja, wat zijn die redenen dan? Ook praktische/financiële redenen
  - Boerentrots/taboe
  - Onbekend met het aanbod, niet weten wat kan hulp eigenlijk voor je kan doen
  - Geen vertrouwen in de hulp
  - Hulpverleners zijn geen agrariërs, zijn de “tegenpartij”, de stadsmens die…enz
  - Ver weg, lange wachttijden, hoge kosten, niet flexibel
  - Angst voor privacy in kleine gemeenschap, komt de buurman het te weten?
- C.q. hoe kijk jij aan tegen mensen die hulp zoeken voor psychosociale problemen?
  - “wie psychische hulp nodig heeft, is gek”
  - Die mensen zijn zwak, hebben “opgegeven”
- Zou je gebruik maken van hulp als die er anders uitzag? Zo ja->
- Hoe zou hulp er dan uit moeten zien voor jou zodat je er gebruik van zou maken?
  - acquisitie
  - Persoonlijk type hulpverlener/kennis van hulpverlener (agrarische achtergrond)
  - Vorm van hulp
    - formeel/informeel
    - gericht op systeem of individu, sociaal netwerk, groepsbijeenkomsten
  - Randvoorwaarden
    - Flexibiliteit (buiten kantooruren, ook op de boerderij)
    - internethulp
  - Financieel aspect
    - Kosten, eigen risico
- Heb je een tip voor hulpverleners die met agrariërs met psychosociale problemen werken?
